# Supplementary material
Source: publisher figshare collection journal article supplement (https://acs.figshare.com/ndownloader/files/5556965)
Supplement: Supplementary file 1 [file 5556965]

# Influence of csgD and ompR on nanomechanics, adhesion forces and curli properties of *E. coli*

*by*

*Stefano Perni<sup>1</sup>, Emily Callard Preedy<sup>1</sup>, Paolo Landini<sup>2</sup> and Polina Prokopovich<sup>1\*</sup>*

<sup>1</sup>Cardiff School of Pharmacy and Pharmaceutical Science, Cardiff University, Cardiff, UK

<sup>2</sup> Department of Biomolecular Sciences and Biotechnology, University of Milan, Milan, Italy

## **Supplementary Material**

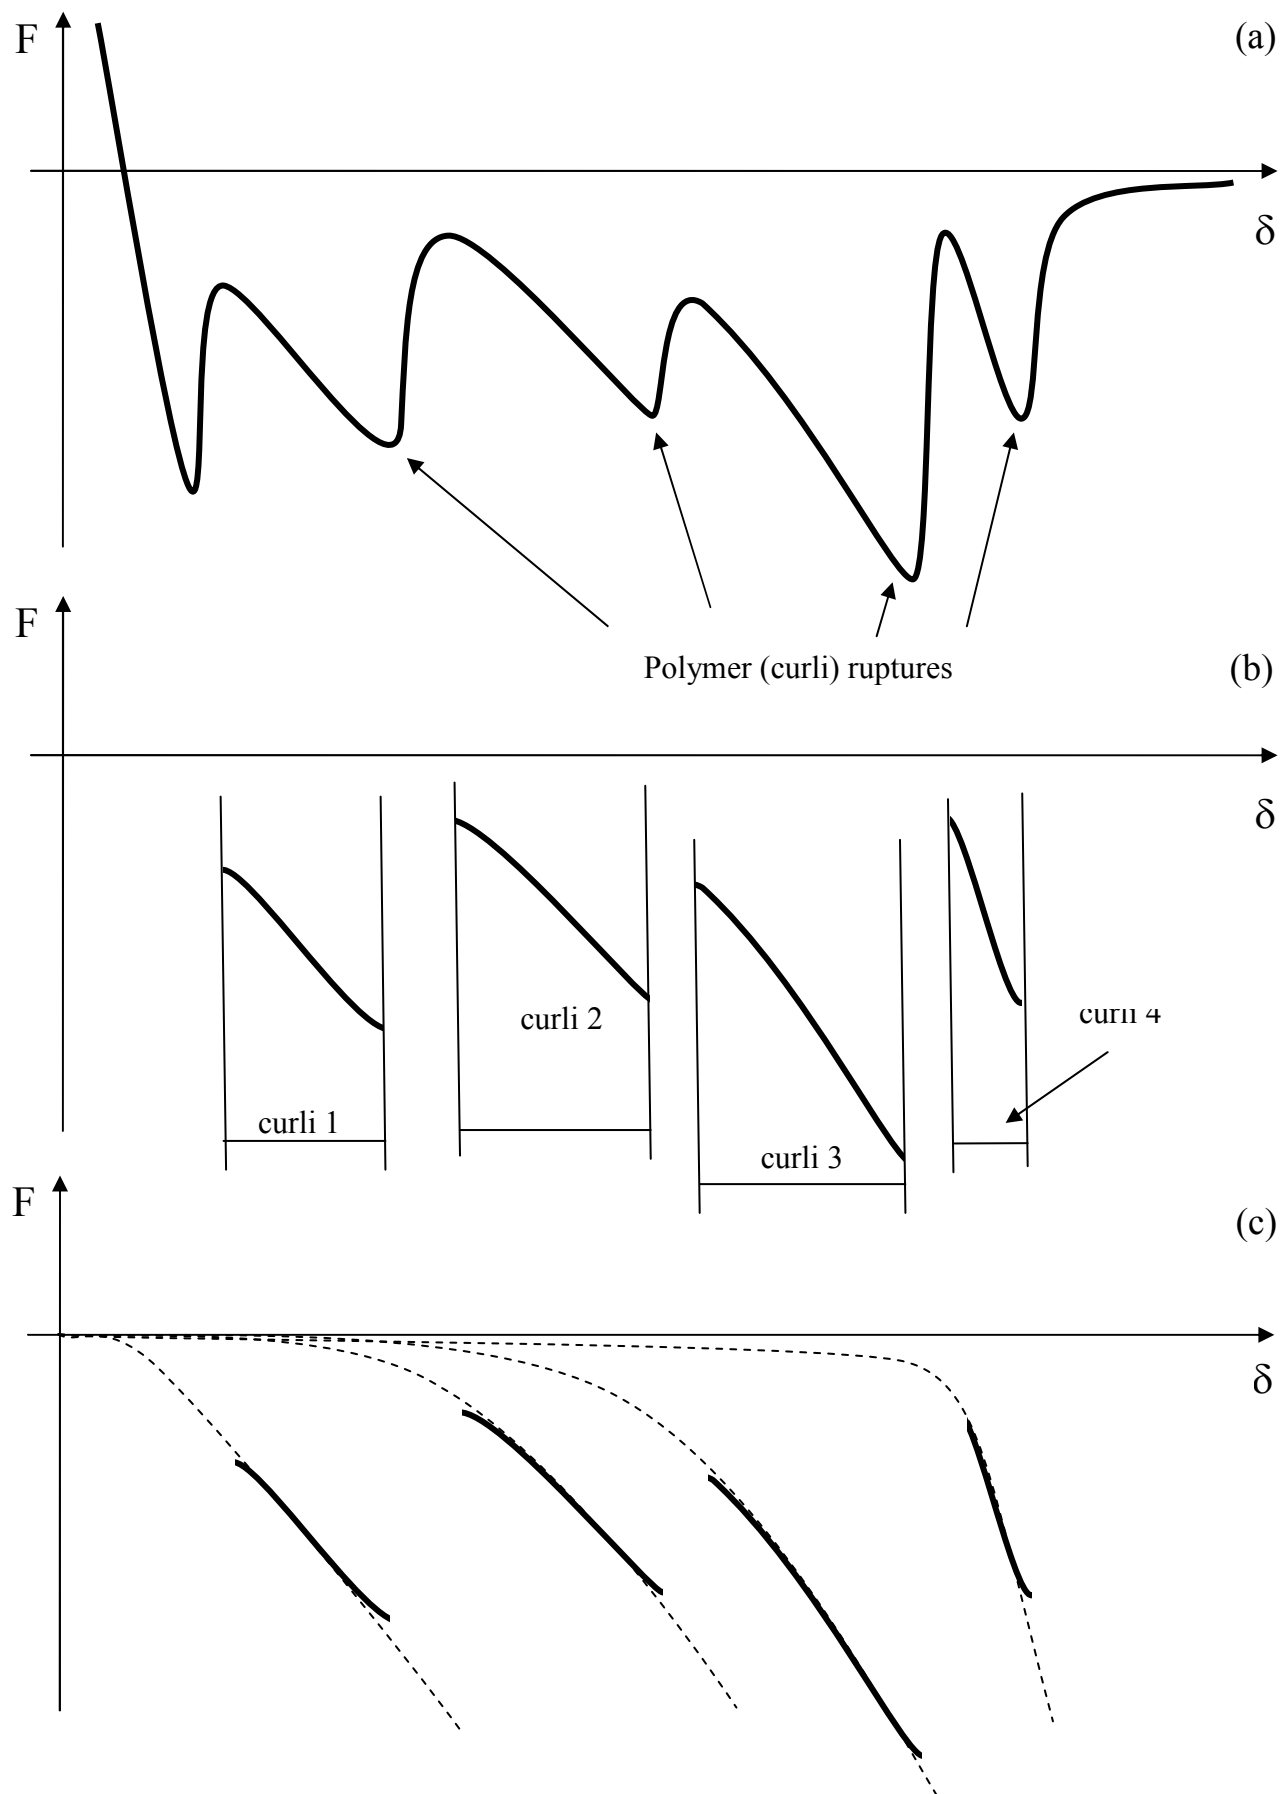

**Figure A1.** Schematic representation of the algorithm for the determination of the number of curli and fitting of FJC model (.....) to relevant sections of the retrace AFM curve (—). In the example in a retrace curve, 4 regions of interest, related to 4 curli (a), were identified (b) and individually modelled with the FJC model (c).

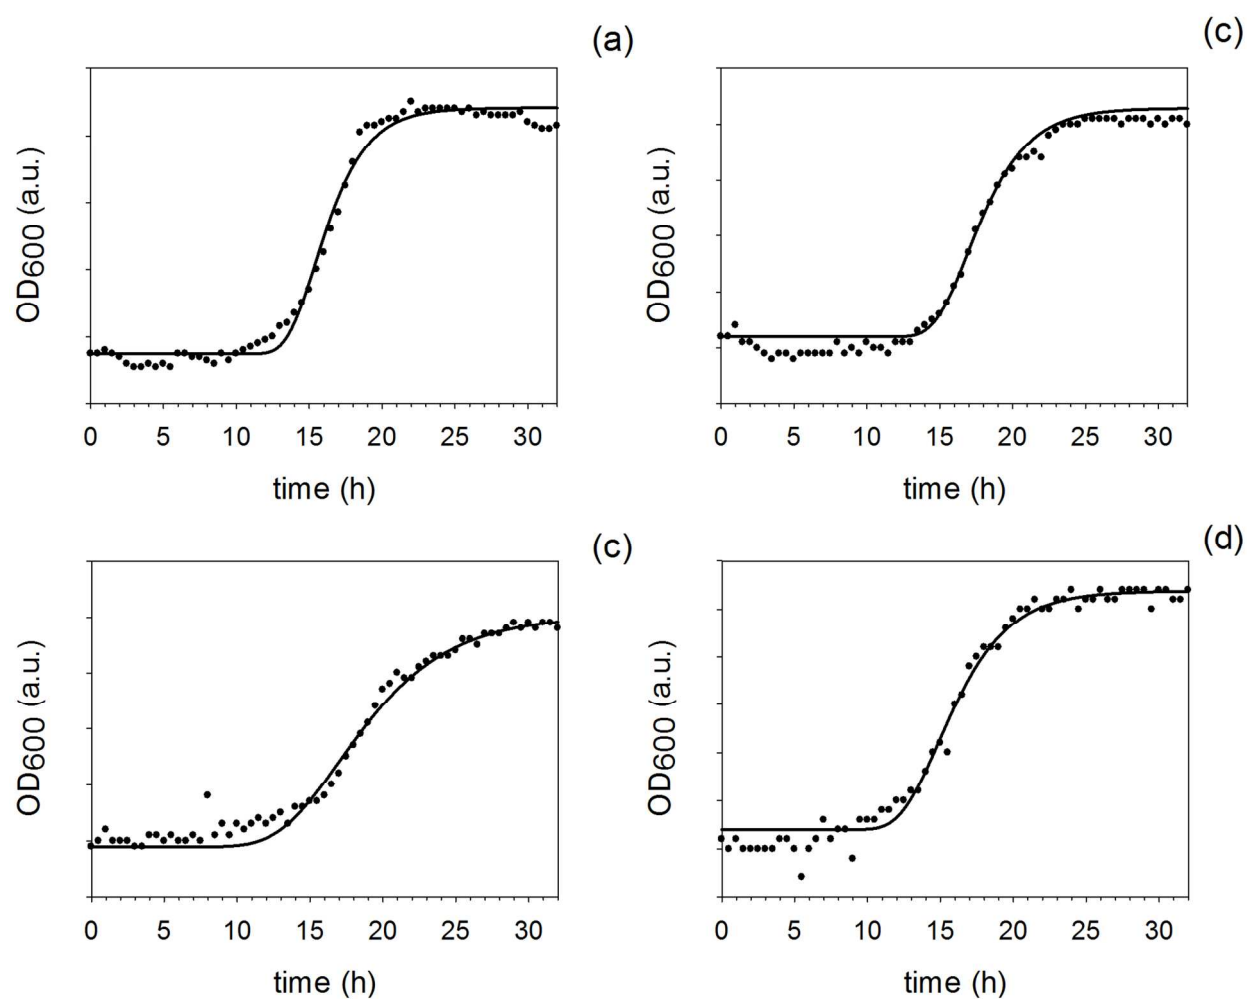

**Figure A2.** Examples of values of growth curve (●) and fitting with Gompertz model (—) of *E. coli* MG1655 (a), *E. coli* MG1655 pT7-7CsgD (b), *E. coli* PHL628 (c) and *E. coli* PHL628 pT7-7CsgD (d). For image clarity the experimental points are plotted at 30 min intervals.

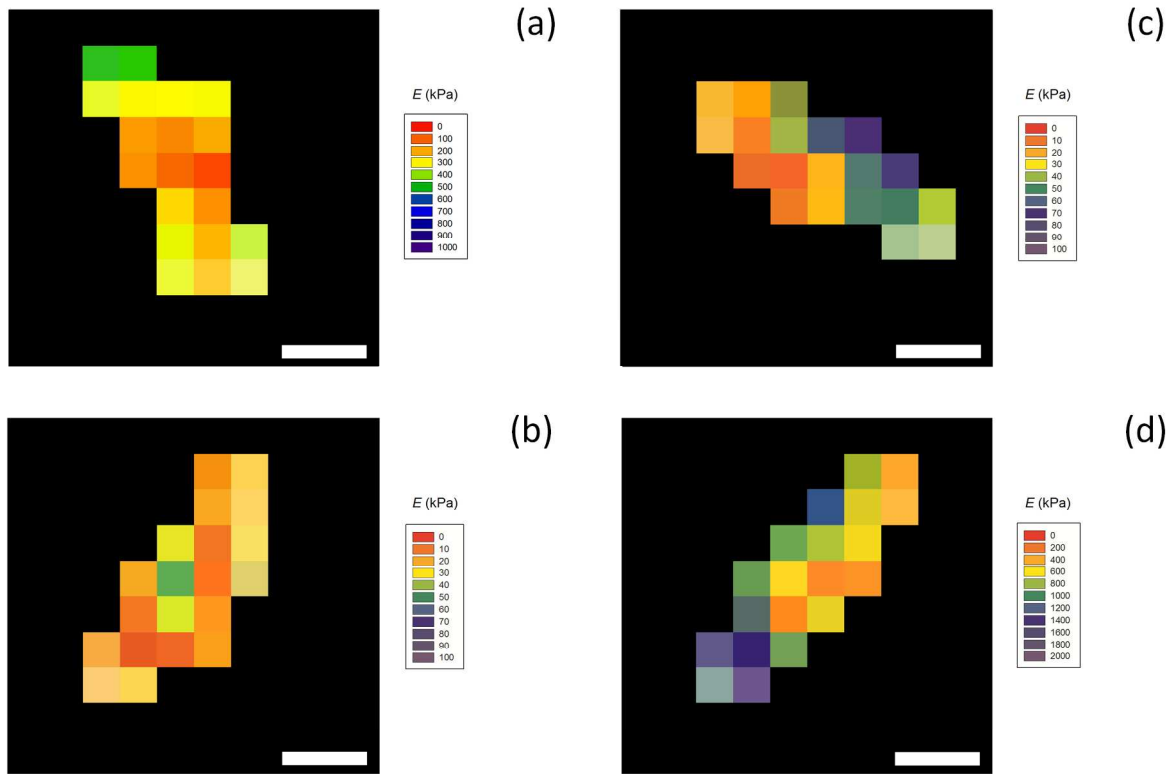

**Figure A3.** Examples of values of Young modulus ( $E$ ) measured on 20 different locations (surface mapping) on the surface of a single cell of *E. coli* MG1655 (a), *E. coli* MG1655 pT7-7CsgD (b), *E. coli* PHL628 (c) and *E. coli* PHL628 pT7-7CsgD (d).

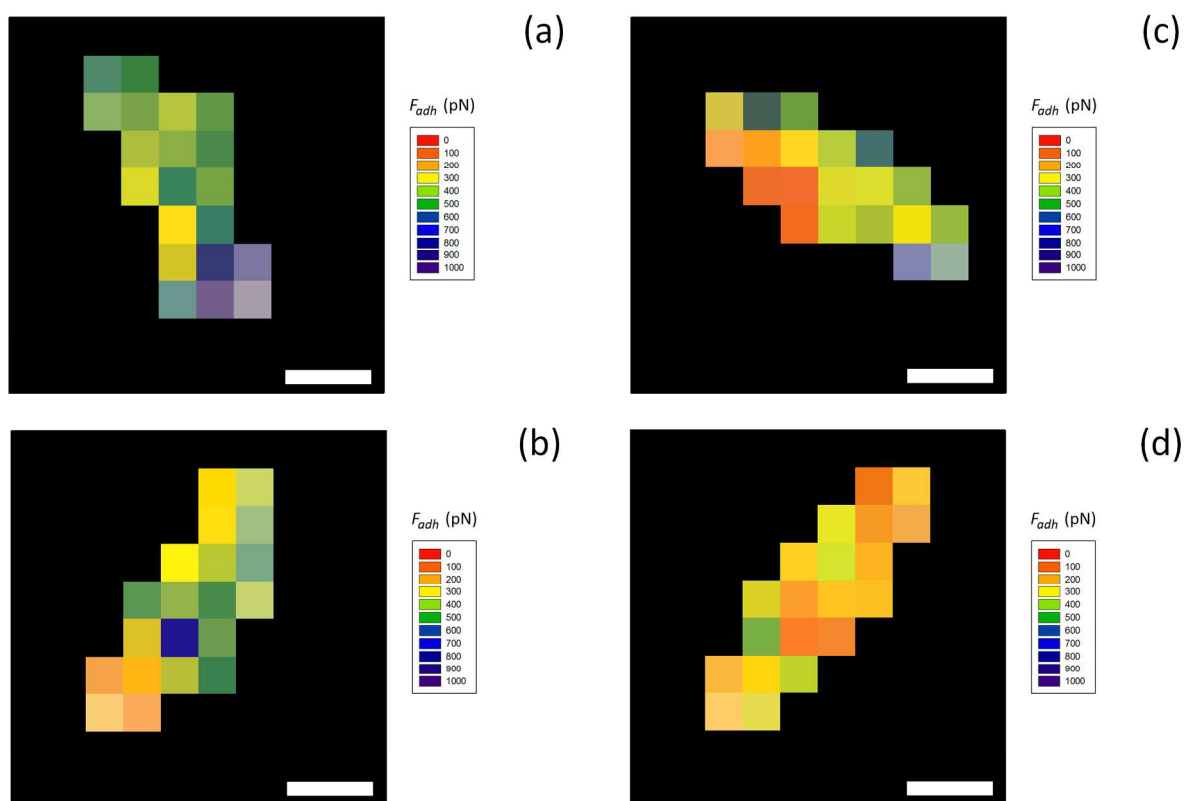

**Figure A4.** Examples of values of adhesion force ( $F_{adh}$ ) measured on 20 different locations (surface mapping) on the surface of a single cell of *E. coli* MG1655 (a), *E. coli* MG1655 pT7-7CsgD (b), *E. coli* PHL628 (c) and *E. coli* PHL628 pT7-7CsgD (d).

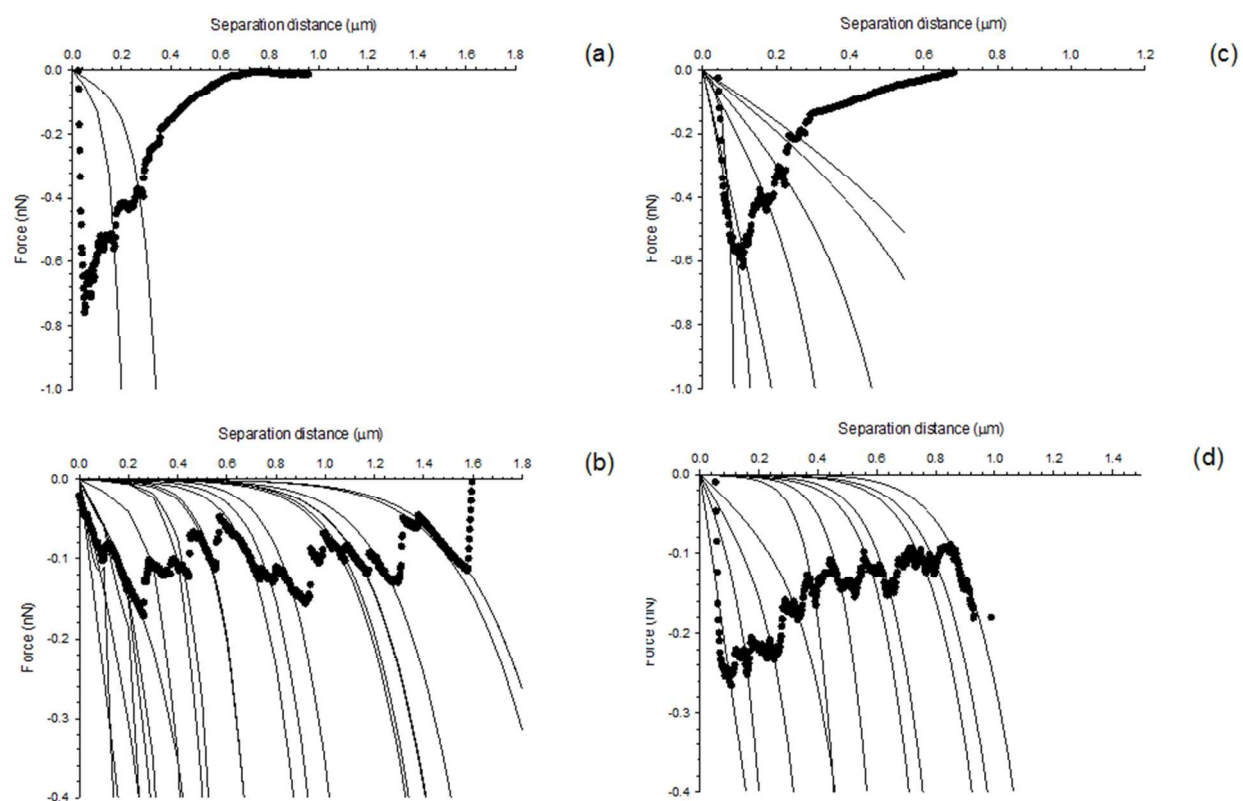

**Figure A5.** Examples of retrace curves for *E. coli* MG1655 (a), *E. coli* MG1655 pT7-7CsgD (b), *E. coli* PHL628 (c), *E. coli* PHL628 pT7-7CsgD (d) and fitting with FJC.

■ retrace curve      — FJC fitting
